# Supplementary material for: A randomized controlled trial of an innovative, user‐friendly, interactive smartphone app‐based lifestyle intervention for weight loss
Source: PubMed Central journal article supplement — Obes Sci Pract. 2021 May 3;7(5):555–68. doi: 10.1002/osp4.503 (PMC8488442; doi:10.1002/osp4.503), 2021-05-03
Supplement: OSP4-7-555-s001.pdf [file OSP4-7-555-s001.pdf]

## Supplementary Table 1

### Inclusion and exclusion criteria for study participants

| Inclusion criteria                                                                     | Exclusion Criteria                                          |
|----------------------------------------------------------------------------------------|-------------------------------------------------------------|
| BMI 25 to 42 kg/m <sup>2</sup>                                                         | Current or planned pregnancy                                |
| Age 18 to 65 years                                                                     | Cardiovascular, pulmonary, renal, and/or joint disease      |
| Employed in sedentary occupations                                                      | Uncontrolled thyroid disease                                |
| Weight stability for last 4 weeks                                                      | History of eating disorders, psychiatric disease            |
| Own a personal smartphone with >4 gigabyte data per month or unlimited                 | History of substance abuse or dependence in the last 1 year |
| Proficient with use of smartphone applications and technology with current daily usage | Diabetes mellitus                                           |
| Home internet availability with personal computer                                      | Night shift work                                            |
| Ability to engage in moderate-intensity exercise                                       | Previous weight-loss surgery                                |
| Ability to comply with all study-related procedures                                    | Use of weight loss drugs/diet/program in the last 6 weeks   |
