# Supplementary material for: A randomized controlled trial of an innovative, user‐friendly, interactive smartphone app‐based lifestyle intervention for weight loss
Source: PubMed Central journal article supplement — Obes Sci Pract. 2021 May 3;7(5):555–68. doi: 10.1002/osp4.503 (PMC8488442; doi:10.1002/osp4.503), 2021-05-03
Supplement: OSP4-7-555-s002.pdf [file OSP4-7-555-s002.pdf]

## Supplementary Table 4

### Diet plans chosen by participants in each study group

|                    | <b>Intervention (n=13)</b> | <b>Control (n=15)</b> | <b>All participants (n=28)</b> |
|--------------------|----------------------------|-----------------------|--------------------------------|
| Low Carbohydrate   | 1 (8%)                     | 0                     | 1 (3.5%)                       |
| Low Glycemic index | 12 (92%)                   | 14 (93%)              | 26 (93%)                       |
| Mediterranean      | 0                          | 1 (7%)                | 1 (3.5%)                       |
