# Supplementary material for: A randomized controlled trial of an innovative, user‐friendly, interactive smartphone app‐based lifestyle intervention for weight loss
Source: PubMed Central journal article supplement — Obes Sci Pract. 2021 May 3;7(5):555–68. doi: 10.1002/osp4.503 (PMC8488442; doi:10.1002/osp4.503), 2021-05-03
Supplement: OSP4-7-555-s003.pdf [file OSP4-7-555-s003.pdf]

### Supplementary Table 3

#### Quantitative parameters for each participant in the intervention group

| Participant | Weight Change (kg) | Weight Change (%) | Total no. of food photographs | Total no. of text messages | Total number of times on scale | Total number of unique days on scale | Mean daily step count |
|-------------|--------------------|-------------------|-------------------------------|----------------------------|--------------------------------|--------------------------------------|-----------------------|
| 1           | -19.28             | -25.48            | 308                           | 141                        | 168                            | 156                                  | 15040                 |
| 2           | -14.56             | -15.18            | 96                            | 166                        | 159                            | 94                                   | 16831                 |
| 3           | -13.2              | -15.32            | 195                           | 142                        | 259                            | 121                                  | 9008                  |
| 4           | -11.52             | -11.67            | 65                            | 199                        | 241                            | 86                                   | 15786                 |
| 5           | -10.57             | -10.64            | 141                           | 105                        | 323                            | 160                                  | 8574                  |
| 6           | -8.03              | -8.42             | 24                            | 20                         | 158                            | 121                                  | 8836                  |
| 7           | -5.53              | -6.43             | 59                            | 17                         | 118                            | 89                                   | 9109                  |
| 8           | -5.49              | -5.03             | 60                            | 38                         | 107                            | 39                                   | 8208                  |
| 9           | -4.17              | -3.85             | 31                            | 35                         | 90                             | 61                                   | 8187                  |
| 10          | -3.27              | -3.41             | 26                            | 18                         | 167                            | 159                                  | 12042                 |
| 11          | -0.73              | -0.71             | 37                            | 47                         | 127                            | 73                                   | 8834                  |
| 12          | 0.09               | 0.13              | 23                            | 8                          | 94                             | 47                                   | 10347                 |
| 13          | 3.13               | 3.03              | 11                            | 3                          | 34                             | 28                                   | 7374                  |
