# Supplementary material for: A randomized controlled trial of an innovative, user‐friendly, interactive smartphone app‐based lifestyle intervention for weight loss
Source: PubMed Central journal article supplement — Obes Sci Pract. 2021 May 3;7(5):555–68. doi: 10.1002/osp4.503 (PMC8488442; doi:10.1002/osp4.503), 2021-05-03
Supplement: OSP4-7-555-s004.pdf [file OSP4-7-555-s004.pdf]

## Supplementary Table 2

### Waist circumference by gender for all participants

|          | <b>Men<br/>(n=4)</b>              | <b>Women<br/>(n=24)</b>           |
|----------|-----------------------------------|-----------------------------------|
| Baseline | 104.93 ± 4.27<br>(91.34 – 118.52) | 102.42 ± 1.84<br>(98.61 – 106.23) |
| 6 month  | 97.00 ± 4.70<br>(82.02 – 111.97)  | 98.48 ± 2.05<br>(94.24 – 102.72)  |

Values are mean ± SEM (95% CI), in cm.
